# Supplementary material for: Mixed T cell lineage chimerism in acute leukemia/MDS using pre-emptive donor lymphocyte infusion strategy—Is it prognostic?—a single-center retrospective study
Source: PubMed Central journal article supplement (PMC8275738; doi:10.1038/s41408-021-00519-y), 2021-07-12

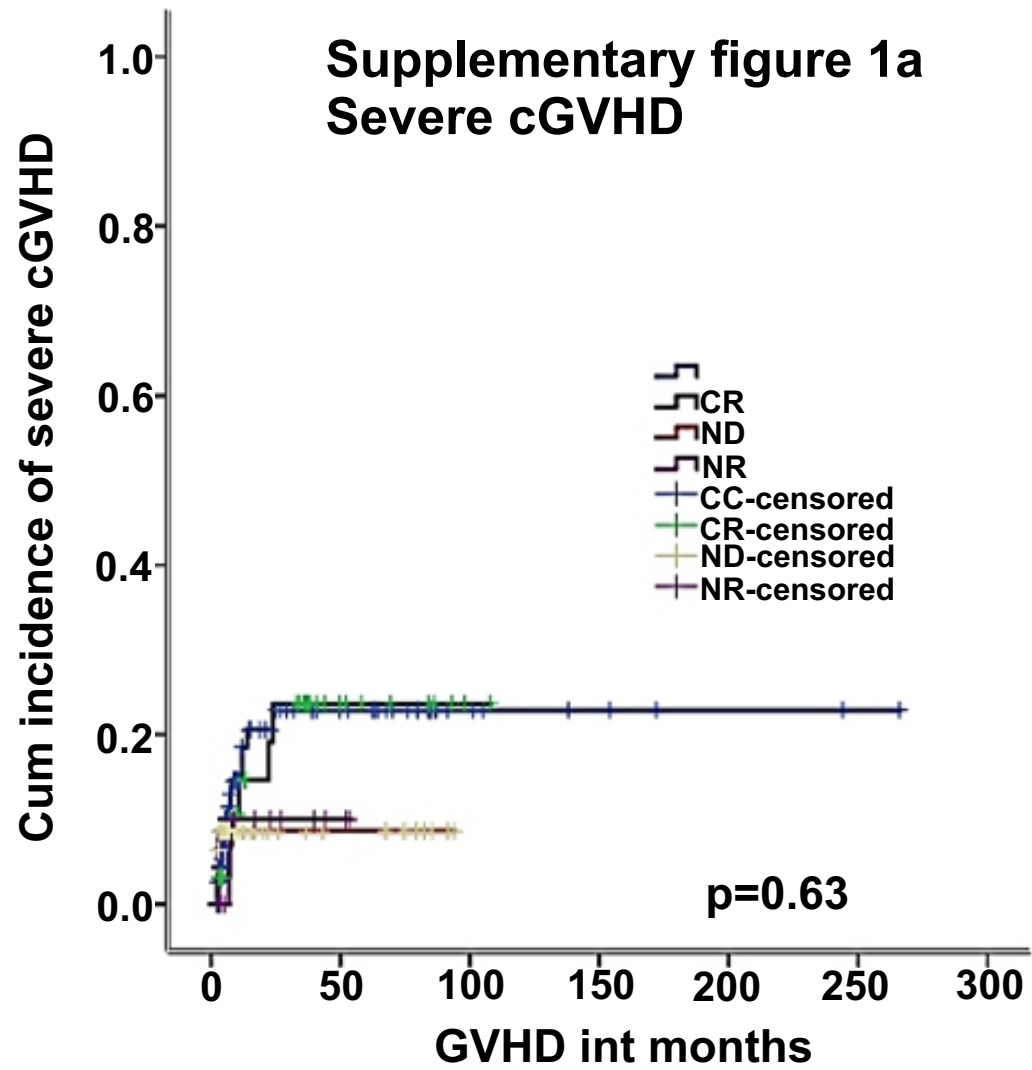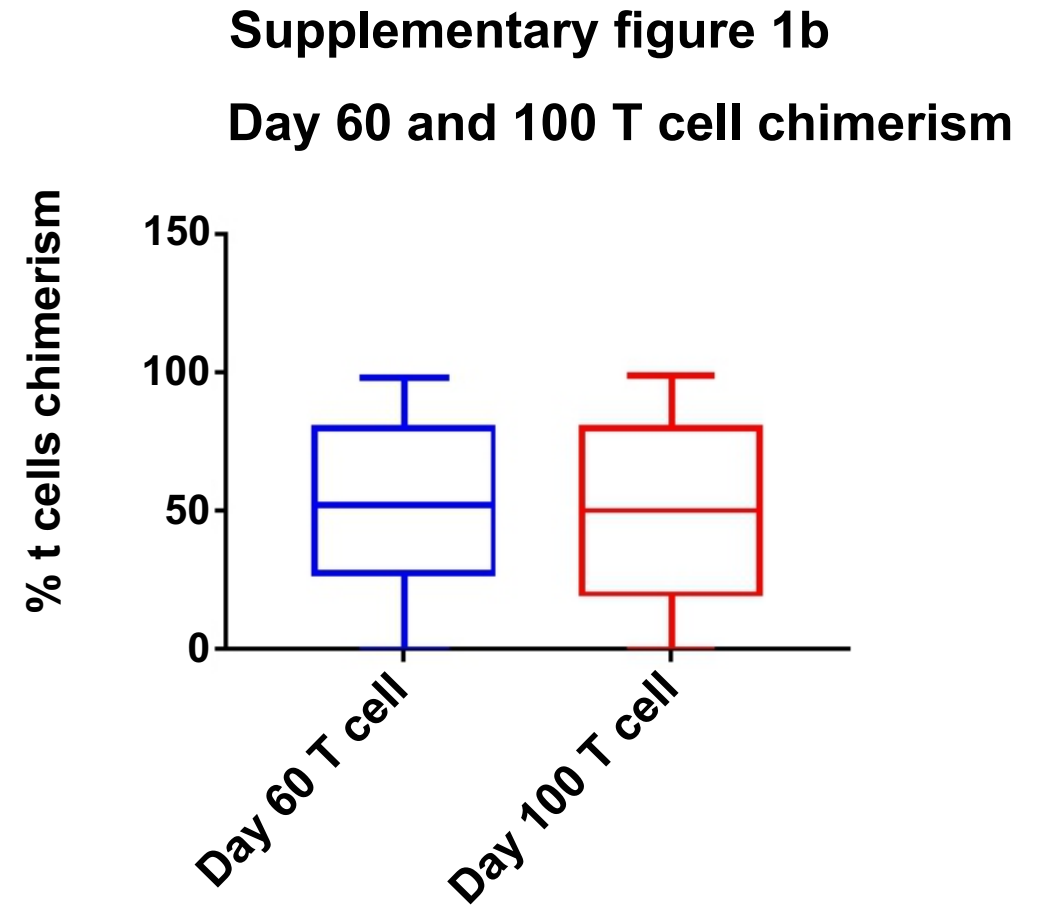

Supplement: 41408_2021_519_MOESM2_ESM.pdf [file 41408_2021_519_MOESM2_ESM.pdf]
